# Supplementary material for: Differences in reported sepsis incidence according to study design: a literature review
Source: PubMed Central journal article supplement (PMC5062833; doi:10.1186/s12874-016-0237-9), 2016-10-12
Supplement: 12874_2016_237_MOESM3_ESM.pdf [file 12874_2016_237_MOESM3_ESM.pdf]

ICD-9 codes used in the included studies.

|                                                 | CDC, 1990 | Angus, 2001* | Martin, 2003 | Dombrovskiy, 2005 | Esper, 2006 | Dombrovskiy, 2007 | Shen, 2010* | Kumar, 2011 | Chen, 2013* |
|-------------------------------------------------|-----------|--------------|--------------|-------------------|-------------|-------------------|-------------|-------------|-------------|
| <b>Sepsis</b>                                   |           |              |              |                   |             |                   |             |             |             |
| Septicemia<br>038.0-038.9                       | •         | •            | •            | •                 | •           | •                 | •           | •           | •           |
| Herpetic septicemia<br>054.5                    |           |              |              | •                 |             | •                 |             |             |             |
| Bacteremia<br>790.7                             |           | •            | •            |                   | •           |                   | •           | •           | •           |
| Disseminated fungal<br>infection<br>117.9       |           | •            | •            |                   | •           |                   | •           | •           | •           |
| Disseminated candidal<br>infection<br>112.5     |           | •            | •            | •                 | •           | •                 | •           | •           | •           |
| Candidal endocarditis<br>112.81                 |           | •            | •            |                   | •           |                   | •           | •           | •           |
| Fungal endocarditis<br>115.04, 115.14, 115.94   |           | •            |              |                   |             |                   | •           | •           | •           |
| Salmonella septicemia<br>003.1                  |           | •            |              | •                 |             | •                 | •           | •           | •           |
| Septicemic plague<br>020.2                      |           | •            | •            | •                 |             | •                 | •           | •           | •           |
| Anthrax septicemia<br>022.3                     |           | •            |              | •                 |             | •                 | •           | •           | •           |
| Meningococcal septicemia<br>036.2               |           | •            |              | •                 |             | •                 | •           | •           | •           |
| Waterhouse Friedrichson<br>Syndrome<br>036.3    |           | •            |              | •                 |             | •                 | •           | •           | •           |
| Gonococemia<br>098.89                           |           | •            |              | •                 |             | •                 | •           | •           | •           |
| Sepsis due to indwelling<br>catheter<br>996.62  |           | •            |              |                   |             |                   | •           | •           | •           |
| Sepsis**<br>995.91                              |           |              |              | •                 |             | •                 |             |             |             |
| Severe sepsis**<br>995.92                       |           |              |              | •                 |             | •                 |             | •           |             |
| Septic shock***<br>785.52                       |           |              |              |                   |             | •                 |             | •           |             |
| <b>Severe sepsis</b>                            |           |              |              |                   |             |                   |             |             |             |
| <b>Respiratory</b>                              |           |              |              |                   |             |                   |             |             |             |
| 93.90<br>Non-invasive mechanical<br>ventilation | NA        |              |              |                   | NA          |                   | •           |             | •           |
| 96.04<br>Continuous positive airway<br>pressure |           |              |              |                   |             |                   | •           |             | •           |
| Ventilator management<br>96.7                   |           | •            | •            |                   |             |                   | •           | •           | •           |



|                                                 |   |   |   |  |  |   |   |   |
|-------------------------------------------------|---|---|---|--|--|---|---|---|
| Disseminated intravascular coagulation<br>286.2 |   | • |   |  |  | • |   | • |
| Purpura fulminans<br>286.6                      | • | • | • |  |  | • | • | • |
| Acquired coagulation factor deficiency<br>286.7 |   |   |   |  |  |   | • |   |
| Coagulopathy<br>286.9                           | • | • | • |  |  | • | • | • |
| Thrombocytopenia, primary<br>287.3              |   | • |   |  |  | • |   | • |
| Thrombocytopenia, secondary<br>287.4            | • | • | • |  |  | • | • | • |
| Thrombocytopenia, unspecified<br>287.5          | • | • | • |  |  | • | • | • |
| Neutropenia<br>288.0                            |   |   |   |  |  |   |   |   |
| Abnormal coagulation profile<br>790.92          |   |   |   |  |  | • |   | • |
| <b>Metabolic</b>                                |   |   |   |  |  |   |   |   |
| Acidosis, metabolic or lactic<br>276.2          |   | • |   |  |  | • | • | • |
| <b>Neurologic</b>                               |   |   |   |  |  |   |   |   |
| Electroencephalography<br>89.14                 |   | • |   |  |  | • | • | • |
| Transient organic psychosis<br>293              | • | • | • |  |  | • | • | • |
| Anoxic brain injury<br>348.1                    | • | • | • |  |  | • | • | • |
| Encephalopathy, acute<br>348.3                  | • | • | • |  |  | • | • | • |
| Coma<br>780.01                                  |   | • | • |  |  | • | • | • |
| Altered consciousness, unspecified<br>780.09    |   | • |   |  |  | • | • | • |

\* 1,286 distinct infection codes included

\*\* Implemented on October 1, 2002

\*\*\* Implemented on October 1, 2003

\*\*\*\* Implemented on October 1, 2003. Only to be used with code 995.2 for severe sepsis.

Where 4-digit codes are listed, all associated subcodes were included.

In case of discrepancies between code number and corresponding code text given by the article, the code given in this table was assigned due to code text.
