# Supplementary material for: Differences in reported sepsis incidence according to study design: a literature review
Source: PubMed Central journal article supplement (PMC5062833; doi:10.1186/s12874-016-0237-9), 2016-10-12

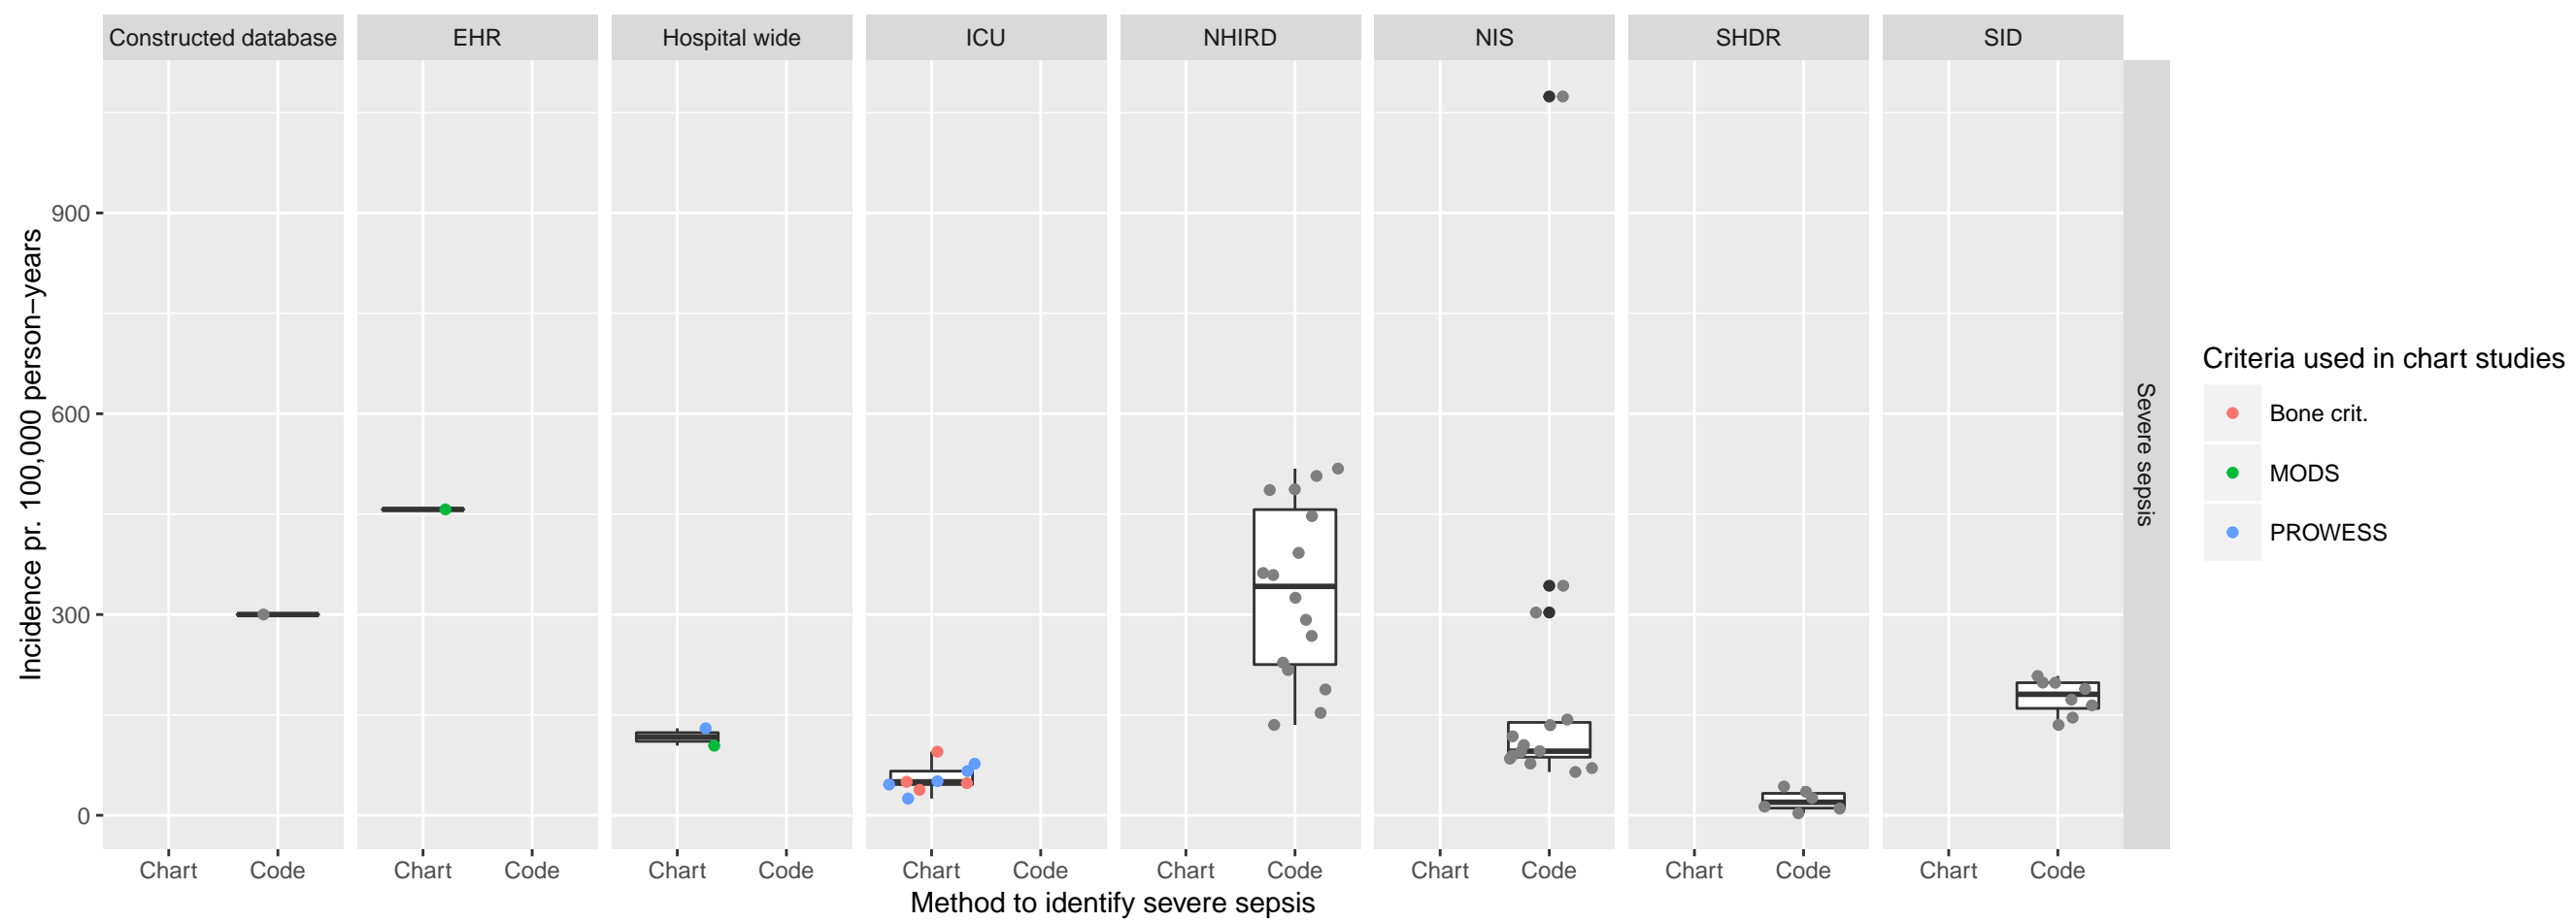

Supplement: 12874_2016_237_MOESM5_ESM.pdf [file 12874_2016_237_MOESM5_ESM.pdf]
